# Supplementary material for: Beneficial Effects of a Curcumin Derivative and Transforming Growth Factor-β Receptor I Inhibitor Combination on Nonalcoholic Steatohepatitis
Source: PubMed Central journal article supplement — Diabetes Metab J. 2023 Apr 25;47(4):500–13. doi: 10.4093/dmj.2022.0110 (PMC10404525; doi:10.4093/dmj.2022.0110), 2023-04-25
Supplement: dmj-2022-0110-Supplementary-Fig-1.pdf [file dmj-2022-0110-Supplementary-Fig-1.pdf]

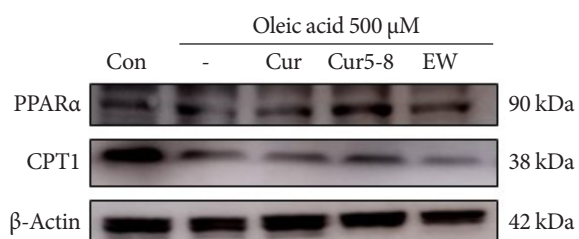

**Supplementary Fig. 1.** Curcumin 2005-8 (Cur5-8) increases  $\beta$ -oxidation which was reduced by oleic acid. After treatment with oleic acid at 500  $\mu$ M in alpha mouse liver 12 (AML12) cells, Cur, Cur5-8, and EW-7197 were treated, respectively, and  $\beta$ -oxidation-related proteins peroxisome proliferator activated receptor alpha (PPAR $\alpha$ ) and carnitine palmitoyltransferase 1 (CPT1) were observed.
