# Supplementary material for: Beneficial Effects of a Curcumin Derivative and Transforming Growth Factor-β Receptor I Inhibitor Combination on Nonalcoholic Steatohepatitis
Source: PubMed Central journal article supplement — Diabetes Metab J. 2023 Apr 25;47(4):500–13. doi: 10.4093/dmj.2022.0110 (PMC10404525; doi:10.4093/dmj.2022.0110), 2023-04-25
Supplement: dmj-2022-0110-Supplementary-Fig-3.pdf [file dmj-2022-0110-Supplementary-Fig-3.pdf]

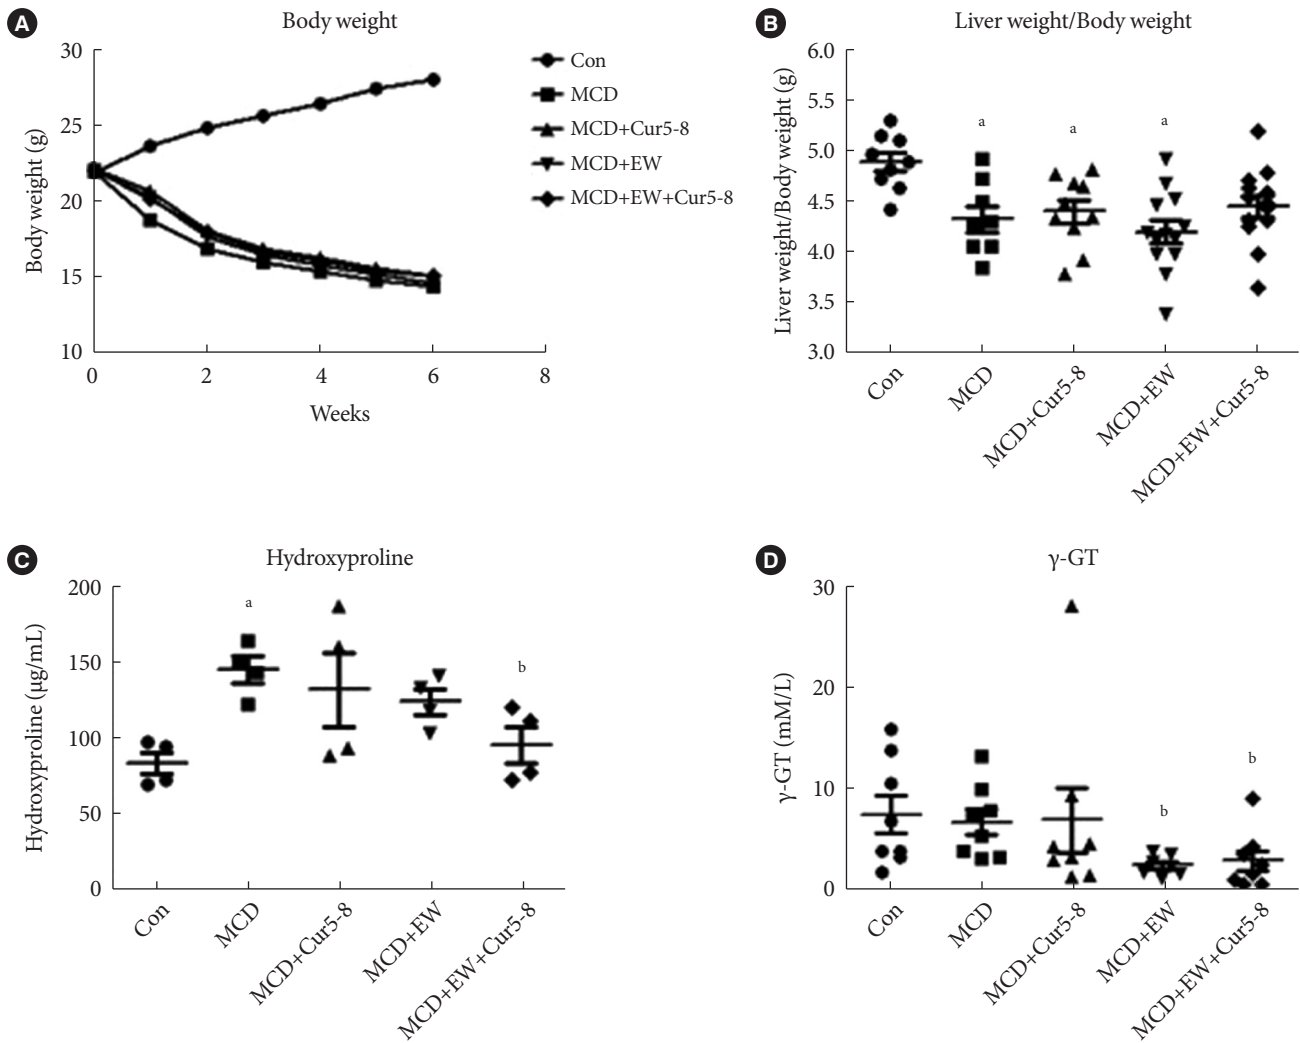

**Supplementary Fig. 3.** Combining curcumin 2005-8 (Cur5-8) and EW-7197 improves hepatic function. (A, B, C) Body weight was measured weekly, and liver tissue weights were measured after sacrificing the mice (D). <sup>a</sup> $P < 0.05$  vs. control (Con), <sup>b</sup> $P < 0.05$  vs. methionine-choline-deficient diet (MCD).
