# Supplementary material for: Beneficial Effects of a Curcumin Derivative and Transforming Growth Factor-β Receptor I Inhibitor Combination on Nonalcoholic Steatohepatitis
Source: PubMed Central journal article supplement — Diabetes Metab J. 2023 Apr 25;47(4):500–13. doi: 10.4093/dmj.2022.0110 (PMC10404525; doi:10.4093/dmj.2022.0110), 2023-04-25
Supplement: dmj-2022-0110-Supplementary-Fig-4.pdf [file dmj-2022-0110-Supplementary-Fig-4.pdf]

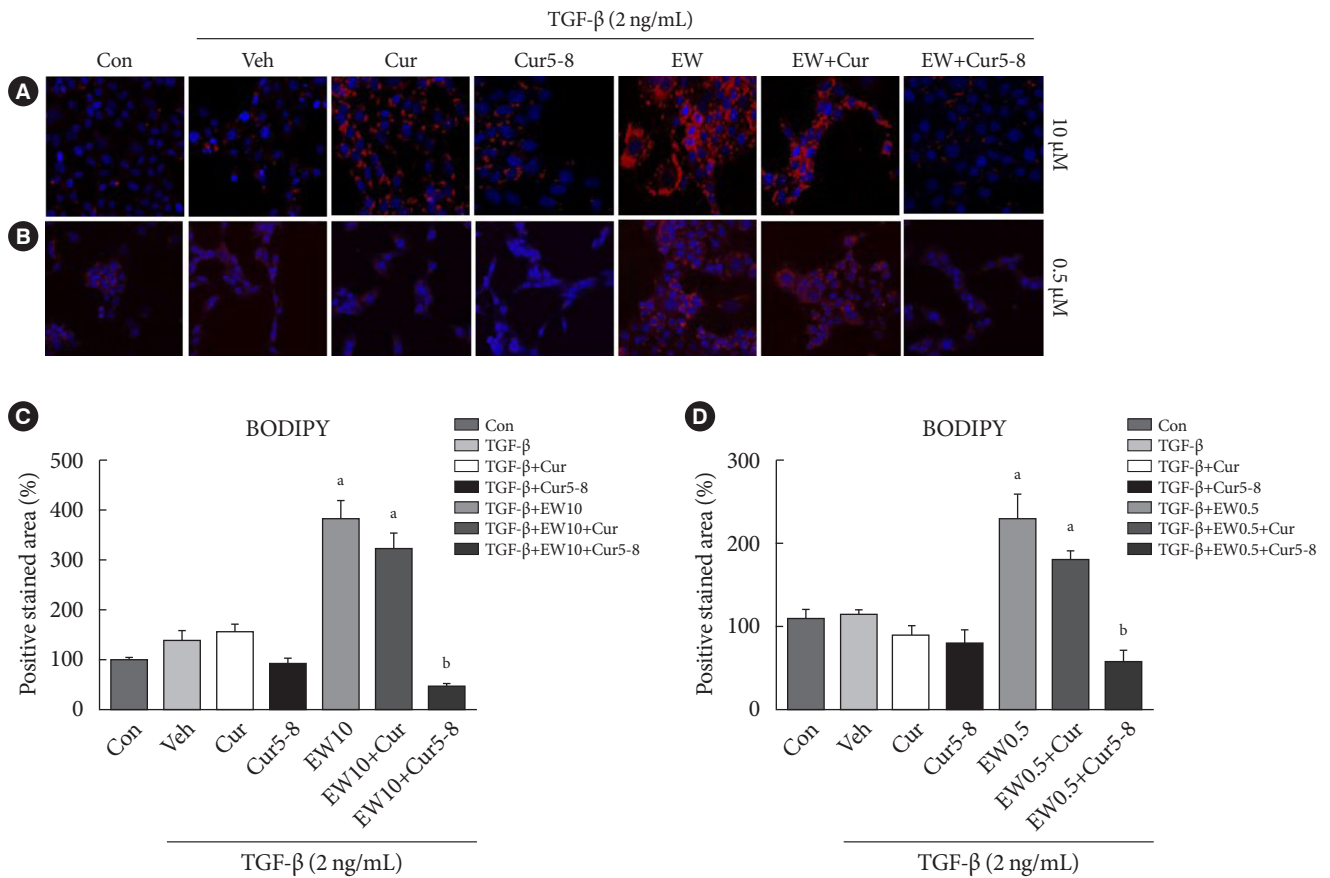

**Supplementary Fig. 4.** Activation of transforming growth factor β (TGF-β) non-canonical pathway by EW-7197 as TGF-β receptor 1 inhibitor. (A, B, C, D) BODIPY staining to determine the effect of dose-dependent EW-7197 as a TGF-β receptor 1 inhibitor on hepatocyte lipid accumulation in alpha mouse liver 12 (AML12) cells. Veh, vehicle. <sup>a</sup>*P*<0.001 vs. control (Con), <sup>b</sup>*P*<0.001 vs. TGF-β+EW.
