# Supplementary material for: Beneficial Effects of a Curcumin Derivative and Transforming Growth Factor-β Receptor I Inhibitor Combination on Nonalcoholic Steatohepatitis
Source: PubMed Central journal article supplement — Diabetes Metab J. 2023 Apr 25;47(4):500–13. doi: 10.4093/dmj.2022.0110 (PMC10404525; doi:10.4093/dmj.2022.0110), 2023-04-25
Supplement: dmj-2022-0110-Supplementary-Fig-5.pdf [file dmj-2022-0110-Supplementary-Fig-5.pdf]

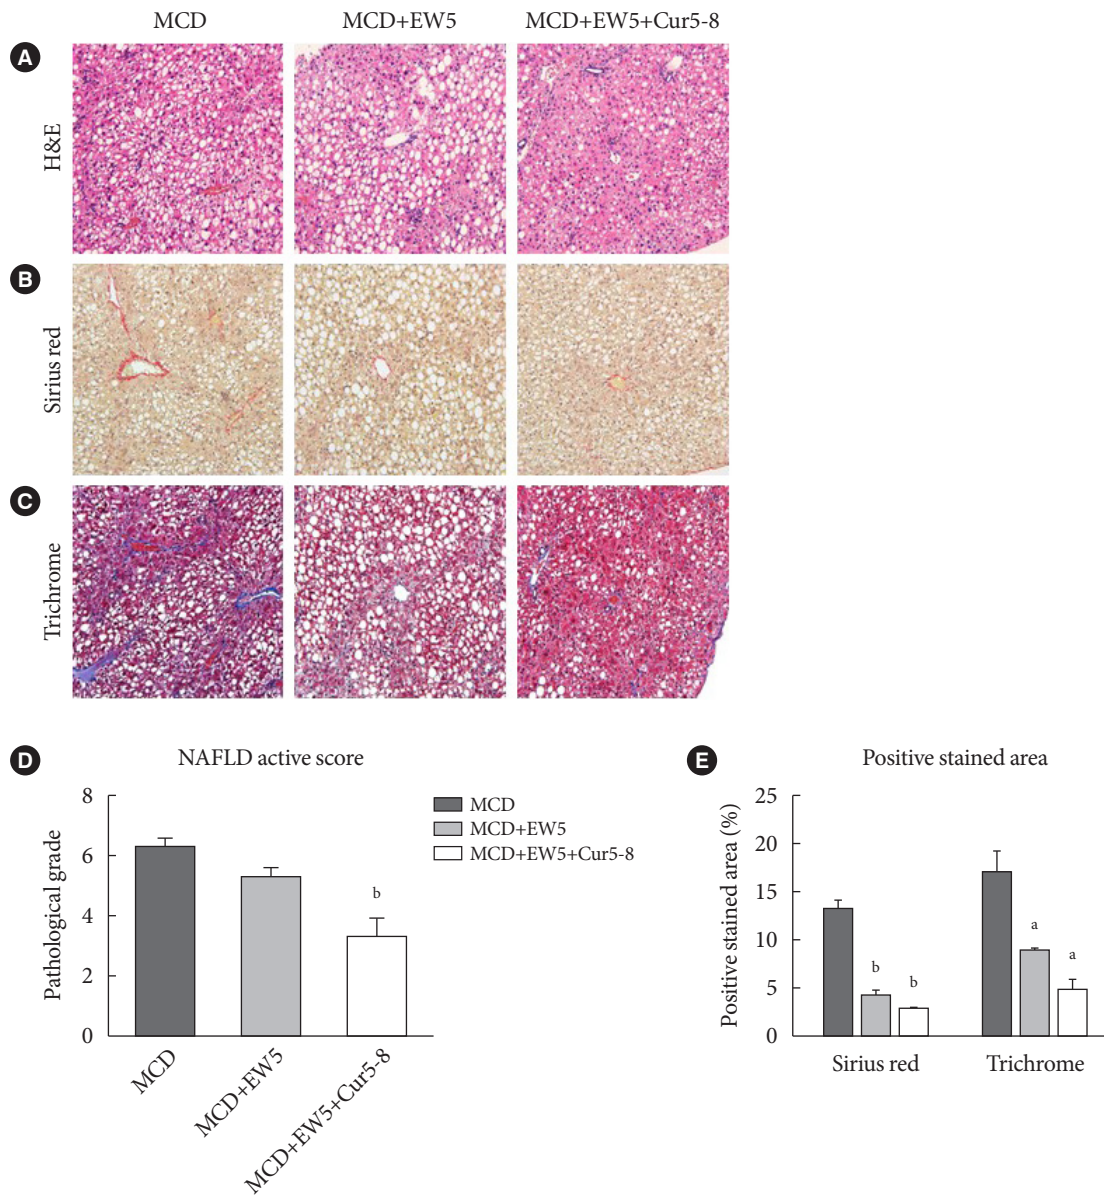

**Supplementary Fig. 5.** Low-dose of EW-7197 improves liver morphology when administered with curcumin 2005-8 (Cur5-8). (A, D) The degree of lipid droplet accumulation was confirmed through H&E staining and nonalcoholic fatty liver disease (NAFLD) active score was scored. (B, C, E) Hepatic fibrosis was verified by Sirius red and trichrome staining and positive stained area was measured. <sup>a</sup> $P < 0.05$  vs. methionine-choline-deficient diet (MCD), <sup>b</sup> $P < 0.001$  vs. MCD.
