# Supplementary material for: Beneficial Effects of a Curcumin Derivative and Transforming Growth Factor-β Receptor I Inhibitor Combination on Nonalcoholic Steatohepatitis
Source: PubMed Central journal article supplement — Diabetes Metab J. 2023 Apr 25;47(4):500–13. doi: 10.4093/dmj.2022.0110 (PMC10404525; doi:10.4093/dmj.2022.0110), 2023-04-25
Supplement: dmj-2022-0110-Supplementary-Fig-6.pdf [file dmj-2022-0110-Supplementary-Fig-6.pdf]

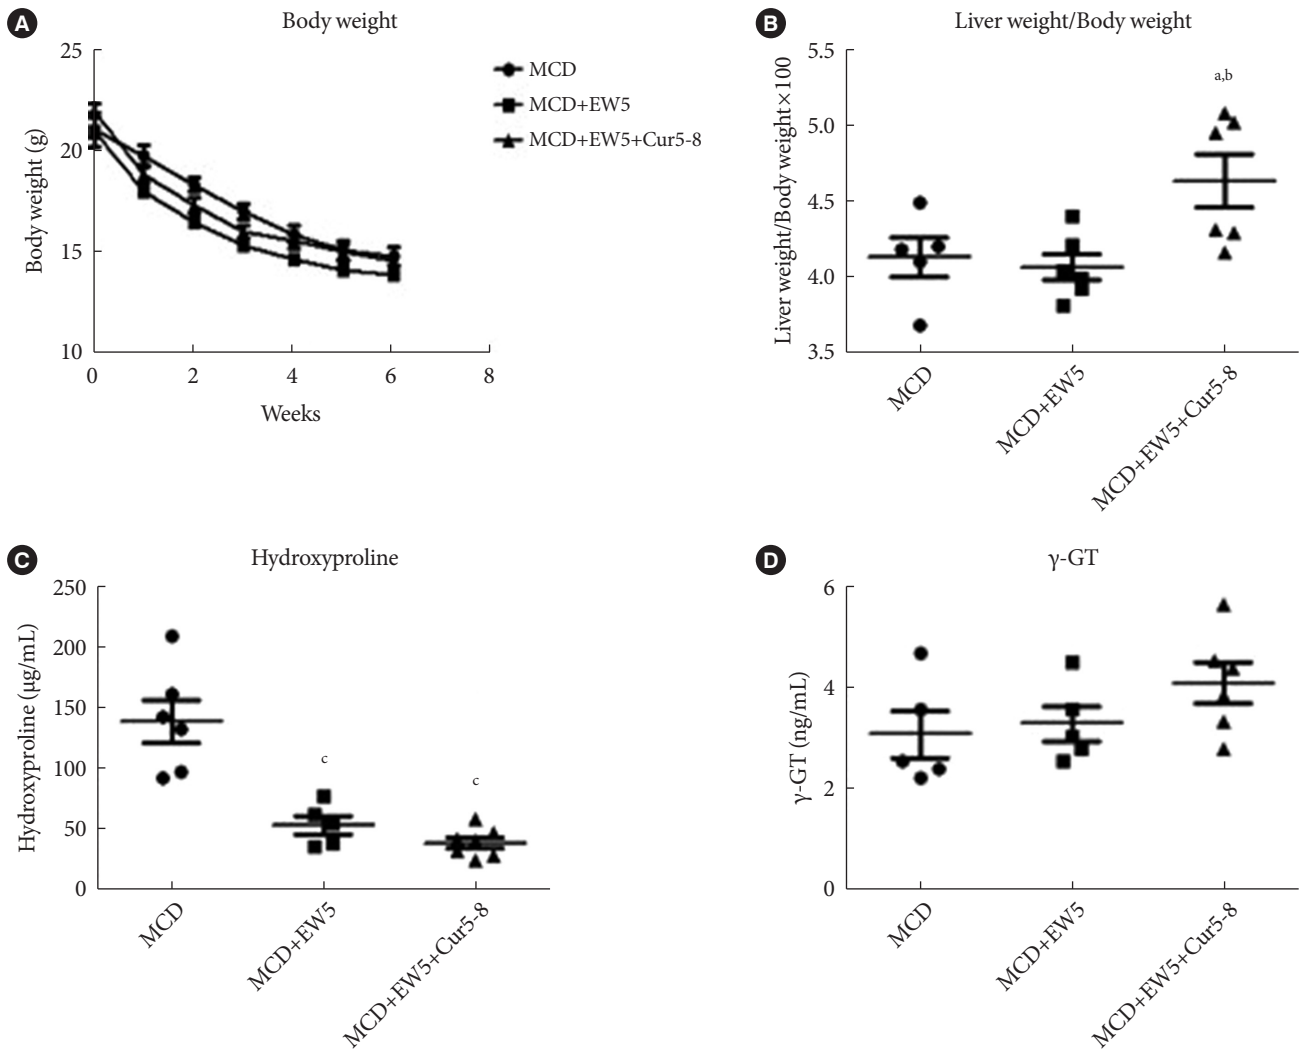

**Supplementary Fig. 6.** Co-administration of curcumin 2005-8 (Cur5-8) and low concentration of EW-7197 was also improving aspartate transaminase (AST) and alanine transaminase (ALT) levels (A, B, D). Measurement of hydroxyproline, a marker of fibrosis, in liver tissue (C). <sup>a</sup> $P < 0.05$  vs. methionine-choline-deficient diet (MCD), <sup>b</sup> $P < 0.05$  vs. MCD+EW5, <sup>c</sup> $P < 0.001$  vs. MCD+EW5.
