# Supplementary material for: Beneficial Effects of a Curcumin Derivative and Transforming Growth Factor-β Receptor I Inhibitor Combination on Nonalcoholic Steatohepatitis
Source: PubMed Central journal article supplement — Diabetes Metab J. 2023 Apr 25;47(4):500–13. doi: 10.4093/dmj.2022.0110 (PMC10404525; doi:10.4093/dmj.2022.0110), 2023-04-25
Supplement: dmj-2022-0110-Supplementary-Table-1.pdf [file dmj-2022-0110-Supplementary-Table-1.pdf]

**Supplementary Table 1.** Co-administration of Cur5-8 and EW-7197 improves AST and ALT levels

| Group                  | BW, g                    | Liver weight/Body weight×100, g | TG, mg/dL              | TC, mg/dL              | AST, IU/L                | ALT, IU/L                |
|------------------------|--------------------------|---------------------------------|------------------------|------------------------|--------------------------|--------------------------|
| Control (regular diet) | 27.5±1.87                | 4.9±0.27                        | 76.8±11.3              | 124.1±8.91             | 40.4±7.16                | 36.6±2.38                |
| MCD                    | 14.8±0.71 <sup>a</sup>   | 4.3±0.36 <sup>a</sup>           | 31.5±7.78 <sup>a</sup> | 14.3±4.05 <sup>a</sup> | 175.0±19.39 <sup>a</sup> | 164.7±18.43 <sup>a</sup> |
| MCD+Cur5-8             | 15.6±0.74 <sup>a,b</sup> | 4.4±0.35 <sup>a</sup>           | 42.4±8.51 <sup>a</sup> | 29.3±8.25 <sup>a</sup> | 119.9±3.80               | 88.9±6.39 <sup>b</sup>   |
| MCD+EW                 | 15.2±0.83 <sup>a</sup>   | 4.2±0.39 <sup>a</sup>           | 30.8±4.54 <sup>a</sup> | 18.5±3.13 <sup>a</sup> | 91.2±13.84 <sup>b</sup>  | 68.4±4.17 <sup>b</sup>   |
| MCD+EW+Cur5-8          | 15.3±0.52 <sup>a,b</sup> | 4.5±0.37                        | 38.6±5.63 <sup>a</sup> | 20.7±2.28 <sup>a</sup> | 89.4±11.87 <sup>b</sup>  | 86.1±10.54 <sup>b</sup>  |

Values are presented as mean±standard error of the mean. Curcumin 2005-8 (Cur5-8), EW-7197, and Cur5-8+EW-7197 were orally-administered for 6 weeks to mice on the MCD diet, and body and liver weights were measured at the end of the experiment. Physiology parameters such as TG, cholesterol, AST, and ALT levels in serum were measured.

AST, aspartate transaminase; ALT, alanine transaminase; BW, body weight; TG, triglyceride; TC, total cholesterol; MCD, methionine-choline-deficient diet.

<sup>a</sup> $P < 0.05$  vs. Con, <sup>b</sup> $P < 0.05$  vs. MCD.
