# Supplementary material for: Beneficial Effects of a Curcumin Derivative and Transforming Growth Factor-β Receptor I Inhibitor Combination on Nonalcoholic Steatohepatitis
Source: PubMed Central journal article supplement — Diabetes Metab J. 2023 Apr 25;47(4):500–13. doi: 10.4093/dmj.2022.0110 (PMC10404525; doi:10.4093/dmj.2022.0110), 2023-04-25
Supplement: dmj-2022-0110-Supplementary-Table-2.pdf [file dmj-2022-0110-Supplementary-Table-2.pdf]

**Supplementary Table 2.** Co-administration of Cur5-8 and low concentration of EW-7197 was also improving AST and ALT levels

| Group           | BW, g     | Liver weight/Body weight×100, g | TG, mg/dL  | TC, mg/dL | AST, IU/L               | ALT, IU/L               |
|-----------------|-----------|---------------------------------|------------|-----------|-------------------------|-------------------------|
| MCD             | 14.9±0.44 | 4.2±0.13                        | 52.4±11.66 | 8.6±1.01  | 168.9±28.37             | 113.0±18.73             |
| MCD+EW 5        | 14.0±0.17 | 4.1±0.09                        | 28.3±4.84  | 9.5±2.37  | 159.6±26.73             | 96.1±17.96              |
| MCD+EW 5+Cur5-8 | 14.7±0.29 | 4.7±0.17 <sup>a</sup>           | 41.3±12.76 | 9.8±0.85  | 91.3±22.34 <sup>a</sup> | 52.4±11.86 <sup>a</sup> |

Values are presented as mean ± standard error of the mean. In mice fed the MCD diet, the concentration of EW-7197 was lowered to 5 mg/kg, and after administration with curcumin 2005-8 (Cur5-8), physiological data such as body weight and liver weight were measured. In addition, physiological data such as serum TG, cholesterol, AST, and ALT were measured.

AST, aspartate transaminase; ALT, alanine transaminase; BW, body weight; TG, triglyceride; TC, total cholesterol; MCD, methionine-choline-deficient diet.

<sup>a</sup> $P < 0.05$  vs. MCD.
